# Supplementary material
Source: publisher figshare collection journal article supplement (https://sage.figshare.com/ndownloader/files/14386256)
Supplement: Supplementary file 1 [file 14386256]

**Supplemental Appendix 1.** Details regarding survey items used in measurement of dependent and key independent variables (demographic controls not included)

|                                                       | Survey items, coding, and Cronbach's alphas                                                                                                                                                                                                                                                                                                                                                                                                                                                                                                                                                                                                                                                                                                                                                                                                                                                           |
|-------------------------------------------------------|-------------------------------------------------------------------------------------------------------------------------------------------------------------------------------------------------------------------------------------------------------------------------------------------------------------------------------------------------------------------------------------------------------------------------------------------------------------------------------------------------------------------------------------------------------------------------------------------------------------------------------------------------------------------------------------------------------------------------------------------------------------------------------------------------------------------------------------------------------------------------------------------------------|
| <i>Dependent variable</i>                             |                                                                                                                                                                                                                                                                                                                                                                                                                                                                                                                                                                                                                                                                                                                                                                                                                                                                                                       |
| Student weapon carrying/use                           | <p><i>In the present school year, how often have you done any of the following... [Responses recoded as 0 = no, 1 = yes]</i></p> <p>Taken a gun to school; Used a gun during a fight; Taken another weapon (knife, brass knuckles, and so on, other than a gun or explosive) to school; Used another weapon during a fight; Taken an explosive to school</p>                                                                                                                                                                                                                                                                                                                                                                                                                                                                                                                                          |
| <i>Level-1 independent variables</i>                  |                                                                                                                                                                                                                                                                                                                                                                                                                                                                                                                                                                                                                                                                                                                                                                                                                                                                                                       |
| Self/family history of institutionalization/treatment | <p><i>Has one of your parents/ any brothers/sisters/ you ever been... [Responses coded as 0 = no, 1 = yes]</i></p> <p>In an alcohol or drug abuse treatment program; In jail or prison; In therapy or counseling; A patient in a mental hospital</p> <p>Cronbach's Alpha = 0.74</p>                                                                                                                                                                                                                                                                                                                                                                                                                                                                                                                                                                                                                   |
| Fear of crime                                         | <p><i>In the current school year, how often are you afraid that the following will happen to you on school grounds or during school-related activities (example: In class, on school bus, at football game, on fieldtrip, and so on)? [Responses coded as 1 = never, 5 = always]</i></p> <p>Be physically attacked (example: punched, slapped, kicked); Be forced to give up your money or property; Have money or property stolen when you are not around; Receive unwelcome sexual remarks from someone; Be touched by someone in a sexual manner without your consent or against your will; Have a gun pulled on you; Have a weapon pulled on you (knife, brass knuckles, and so on, other than a gun)</p> <p>Cronbach's Alpha = 0.82</p>                                                                                                                                                          |
| Anxiety/depression                                    | <p><i>The following questions are about how you might have been thinking, feeling, or acting recently. For each question, please mark how often the statement has been true for you during the past month [Responses coded as 1 = never, 4 = always]</i></p> <p>I worry about other people laughing at me; I get scared when I'm home alone; I have trouble getting my breath; I don't like doing things in front of other people; I get shaky or jittery; I'm afraid that other kids will make fun of me; I get dizzy or faint feelings; I'm jumpy; I'm afraid other people will think I'm stupid; I keep a light on in my room at night; I have pains in my chest; I try not to get called on in class; I feel strange, weird, or unreal; I try to do things other people will like; I worry about what other people think of me; I avoid watching scary movies and TV shows; My heart races or</p> |

|                      |                                                                                                                                                                                                                                                                                                                                                                                                                                                                                                                                                                                                                                                                                                                                                                                                                                                                                                                                                                                                                                               |
|----------------------|-----------------------------------------------------------------------------------------------------------------------------------------------------------------------------------------------------------------------------------------------------------------------------------------------------------------------------------------------------------------------------------------------------------------------------------------------------------------------------------------------------------------------------------------------------------------------------------------------------------------------------------------------------------------------------------------------------------------------------------------------------------------------------------------------------------------------------------------------------------------------------------------------------------------------------------------------------------------------------------------------------------------------------------------------|
|                      | <p>skips beats; I stay away from things that upset me; I don't like to speak in public; I feel restless and on edge; I try to do everything exactly right; My hands shake; My hands feel sweaty or cold; I feel shy</p> <p>Cronbach's Alpha = 0.91</p>                                                                                                                                                                                                                                                                                                                                                                                                                                                                                                                                                                                                                                                                                                                                                                                        |
| Low self-control     | <p><i>Please mark how often the following statements are true</i><br/>[Responses coded as 1 = never true, 4 = always true]</p> <p>I have trouble controlling my temper; I have difficulty remaining seated at school; I develop a plan for all my important goals*; I get very restless after a few minutes if I am supposed to sit still; I put my plans into action*; When I am angry, I lose control over my actions; I have difficulty keeping attention on tasks; I get so frustrated that I feel like a bomb ready to explode; Once I have a goal, I make a plan how to reach it*; Little things or distraction/interruptions throw me off; As soon as I see things are not working, I do something about it*; I'm nervous or on edge; I can't seem to stop moving; I consider what will happen before I make a plan*; I don't pay attention to what I'm doing; I am afraid I will lose control of my feelings; I spend time thinking about how to reach my goals*</p> <p>Cronbach's Alpha = 0.83</p> <p>* indicates reverse coding</p> |
| Actual victimization | <p><i>In the current school year, how many times have the following things happened to you on school grounds or during school-related activities?</i> [ 0 = no victimization...10=10+]</p> <p>Been physically attacked (example: punched, slapped, kicked); Been forced to give up your money or property; Had money or property stolen when you were not around; Received unwelcome sexual remarks from someone; Been touched by someone in a sexual manner without your consent or against your will; Had a gun pulled on you; Had a weapon pulled on you (knife, brass knuckles, and so on, other than gun)</p> <p>Cronbach's Alpha = 0.76</p>                                                                                                                                                                                                                                                                                                                                                                                             |
| Own delinquency      | <p><i>In the present school year, how often have you done any of the following...</i> [Responses coded as 1 = never, 5 = daily]</p> <p>Smoked cigarettes; Smoked cigars; Used spit tobacco; Drunk alcohol; Gotten drunk; Smoked marijuana; Used inhalants (huffing); Used cocaine; Used speed; Used crystal meth; Sold marijuana or other drugs; Skipped school; Forced someone <i>at school</i> to give up their money or property; Forced someone <i>not at school</i> to give up their money or property; Stolen someone's money or property <i>at school</i> when they were not around; Stolen someone's money or property <i>not at school</i> when they were not around; Physically attacked</p>                                                                                                                                                                                                                                                                                                                                        |

|                   |                                                                                                                                                                                                                                                                                                                                                                                                                                                                                                                                                                                                                                                                                                                                                                                                                                                                                       |
|-------------------|---------------------------------------------------------------------------------------------------------------------------------------------------------------------------------------------------------------------------------------------------------------------------------------------------------------------------------------------------------------------------------------------------------------------------------------------------------------------------------------------------------------------------------------------------------------------------------------------------------------------------------------------------------------------------------------------------------------------------------------------------------------------------------------------------------------------------------------------------------------------------------------|
|                   | <p>someone <i>at school</i> (punched, slapped, kicked); Physically attacked someone <i>not at school</i> (punched, slapped, kicked); Been suspended/expelled from school; Said unwelcome sexual remarks to someone <i>at school</i>; Touched someone in a sexual manner without their consent or against their will <i>not at school</i>; Gotten arrested; Driven after drinking; run away from home; Vandalized public or private property (example: destroyed property, graffiti, and so on)</p> <p>Cronbach's Alpha = 0.94</p>                                                                                                                                                                                                                                                                                                                                                     |
| Delinquent peers  | <p><i>Out of those closest friends, how many of them have done any of the following things in the present school year?</i> [Responses recoded as 0 = no, 1 = yes]</p> <p>Smoked cigarettes daily for one week or more; Used smokeless tobacco daily for one week or more; Gotten drunk; Smoked marijuana; Used inhalants (huffing); Used cocaine; Cut school completely; Driven after drinking; Been suspended from school; Taken a gun to school; Taken an explosive to school; Taken a weapon to school (knife, brass knuckles, and so on, other than gun or explosive); Gotten arrested; Sold marijuana or other drugs; Stolen someone's money or property when they were not around; Physically attacked someone (example: punched, slapped, kicked); Vandalized public or private property (example: destroyed property, graffiti, and so on)</p> <p>Cronbach's Alpha = 0.92</p> |
| Peer attachment   | <p><i>Think of the people you consider your closest friend(s). How strongly do you agree or disagree with the following statements?</i> [Responses coded as 1 = strongly disagree, 4 = strongly agree]</p> <p>I respect the opinions of my closest friend(s); My best friend(s) would stick by me if I got in trouble; The people I think of as my best friend(s) also think of me as a best friend; I fit in well with my best friend(s); My best friend(s) take an interest in my problems; I take an interest in the problems of my closest friend(s)</p> <p>Cronbach's Alpha = 0.91</p>                                                                                                                                                                                                                                                                                           |
| School attachment | <p><i>How strongly do you agree or disagree with the following statements about your school?</i> [Responses coded as 1 = strongly disagree, 4 = strongly agree; Items 2, 4, and 5 were reverse-coded]</p> <p>I care a lot about what my teachers think of me; Most of my teachers are not interested in anything I say or do; Getting an education is important to me; I would quit school now if I could; Most of my classes are a waste of time; I look forward to coming to school most mornings</p> <p>Cronbach's Alpha = 0.70</p>                                                                                                                                                                                                                                                                                                                                                |

|                                      |                                                                                                                                                                                                                                                                                                                                                                                                                                                                                                                                                                                                                                                                                                                                                                                                                                                                                                                                                                                                                                                                                                                                                                                                                                                                                                                                                                                                                                                                                                                                                                                              |
|--------------------------------------|----------------------------------------------------------------------------------------------------------------------------------------------------------------------------------------------------------------------------------------------------------------------------------------------------------------------------------------------------------------------------------------------------------------------------------------------------------------------------------------------------------------------------------------------------------------------------------------------------------------------------------------------------------------------------------------------------------------------------------------------------------------------------------------------------------------------------------------------------------------------------------------------------------------------------------------------------------------------------------------------------------------------------------------------------------------------------------------------------------------------------------------------------------------------------------------------------------------------------------------------------------------------------------------------------------------------------------------------------------------------------------------------------------------------------------------------------------------------------------------------------------------------------------------------------------------------------------------------|
| Parental attachment                  | <p><i>How often do the following happen with your mother (biological or adoptive mother only)/father (biological or adoptive father only) even if your mother/father does not live with you?</i> [Responses coded as 1 = never, 5 = always]</p> <p>My mother seems to understand me; My mother makes rules that seem fair to me; My mother knows where I am when I am away from home; My mother knows who I am with when I am away from home; My mother is concerned with how I am doing in school; My mother helps me with my homework; My mother talks to me about my report card; My mother sets a time for me to be home at night; My mother makes me feel wanted; I share my thoughts and feelings with my mother; I do things (example: watch TV, go to sports events, go to dinner, and so on) with my mother; When I get home from school, my mother is home too; I talk to my mother; I see my mother; My father seems to understand me; My father makes rules that seem fair to me; My father knows where I am when I am away from home; My father knows who I am with when I am away from home; My father is concerned with how I am doing in school; My father helps me with my homework; My father talks to me about my report card; My father sets a curfew for me; My father makes me feel wanted; I share my thoughts and feelings with my father; I do things (example: watch TV, go to sports events, go to dinner, and so on) with my father; When I get home from school, my father is home too; I talk to my father; I see my father</p> <p>Cronbach's Alpha = 0.93</p> |
| Gun access                           | <p><i>The following questions are about gun ownership.</i> [Responses coded as 0 = no, 1 = yes]</p> <p>Do your parents own a handgun; Do your parents own a rifle or shotgun; Do you personally own a handgun; Do you personally own a rifle and shotgun</p> <p>Cronbach's Alpha = 0.70</p>                                                                                                                                                                                                                                                                                                                                                                                                                                                                                                                                                                                                                                                                                                                                                                                                                                                                                                                                                                                                                                                                                                                                                                                                                                                                                                  |
| <i>Level-2 independent variables</i> |                                                                                                                                                                                                                                                                                                                                                                                                                                                                                                                                                                                                                                                                                                                                                                                                                                                                                                                                                                                                                                                                                                                                                                                                                                                                                                                                                                                                                                                                                                                                                                                              |
| School disorder                      | <p><i>Indicate the extent to which you disagree/agree with the following...</i> [Responses coded as 1 = strongly disagree, 5 = strongly agree]</p> <p>Noisy hallways are a problem at this school; Broken lockers are a problem at this school; Broken windows are a problem at this school; Peeling paint is a problem at this school; Poor lighting is a problem at this school; Graffiti/defacement is a problem at this school; Trash/litter is a problem at this school; Unkempt exterior grounds are a problem at this school</p> <p>Cronbach's Alpha = 0.86</p>                                                                                                                                                                                                                                                                                                                                                                                                                                                                                                                                                                                                                                                                                                                                                                                                                                                                                                                                                                                                                       |

|                 |                                                                                                                                                                                                                                                                                                                                                                                                                                                                                                                                                                                                                                                                                                                                                                                                                                                                                                                                                                                                                                             |
|-----------------|---------------------------------------------------------------------------------------------------------------------------------------------------------------------------------------------------------------------------------------------------------------------------------------------------------------------------------------------------------------------------------------------------------------------------------------------------------------------------------------------------------------------------------------------------------------------------------------------------------------------------------------------------------------------------------------------------------------------------------------------------------------------------------------------------------------------------------------------------------------------------------------------------------------------------------------------------------------------------------------------------------------------------------------------|
| School efficacy | <p><i>Indicate the extent to which you disagree/agree with the following...</i> [Responses coded as 1 = strongly disagree, 5 = strongly agree]</p> <p>Administrators and teachers collaborate toward making the school run effectively; There is little administrator-teacher tension in this school; Our principal is a good representative of our school before the superintendent and the board; The principal encourages experimentation in teaching; Teacher evaluation is used in improving teacher performance; The principal is aware of and lets staff members and students know when they have done something particularly well; Teachers and students can arrange to deviate from the prescribed program of this school; Teachers feel free to communicate with the principal; The administration is supportive of teachers; Teachers have a say about how this school is run; The principal of this school shares decision-making; Teachers and administrators get along well at this school</p> <p>Cronbach's Alpha = 0.93</p> |
| School security | <p><i>Following items address issues of security and surveillance.</i> [Responses coded as 0 = no, 1 = yes]</p> <p>Does your school employ security guards during the day; Do police patrol outside the school on a regular basis; Are police stationed inside the school; Does your school actively involve the police in daily decision-making on crime/disorder and security; Does your school conduct regular locker checks; Does your school have metal detectors; Does your school allow students to carry backpacks/bookbags; Are visitors required to sign-in when entering the school; Are visitors required to sign-out when they are leaving the school; Are the hallways monitored; Are the bathrooms monitored; Are the entrances to the school building monitored; Are the stairwells monitored; Is the cafeteria monitored</p> <p>Cronbach's Alpha = .77</p>                                                                                                                                                                 |

**Supplemental Appendix 2: Bivariate Correlations Among Level-1 Variables**

|                                    | 1       | 2      | 3      | 4      | 5      | 6      | 7      | 8      | 9     | 10     | 11     | 12     | 13     | 14   | 15 |
|------------------------------------|---------|--------|--------|--------|--------|--------|--------|--------|-------|--------|--------|--------|--------|------|----|
| 1. Any weapon carrying/use         | —       |        |        |        |        |        |        |        |       |        |        |        |        |      |    |
| 2. History of institutionalization | .254*   | —      |        |        |        |        |        |        |       |        |        |        |        |      |    |
| 3. Fear of crime                   | .180*   | .182*  | —      |        |        |        |        |        |       |        |        |        |        |      |    |
| 4. Anxiety/depression              | .119*   | .223*  | .354*  | —      |        |        |        |        |       |        |        |        |        |      |    |
| 5. Low self-control                | .266*   | .277*  | .247*  | .349*  | —      |        |        |        |       |        |        |        |        |      |    |
| 6. Actual victimization            | .245*   | .232*  | .577*  | .272*  | .283*  | —      |        |        |       |        |        |        |        |      |    |
| 7. Delinquent offending            | .538*   | .435*  | .254*  | .192*  | .364*  | .339*  | —      |        |       |        |        |        |        |      |    |
| 8. Delinquent peers                | .350*   | .304*  | .217*  | .177*  | .323*  | .314*  | .473*  | —      |       |        |        |        |        |      |    |
| 9. Peer attachment                 | -.0137* | -.068* | -.061* | -.040* | -.209* | -.073* | -.157* | -.118* | —     |        |        |        |        |      |    |
| 10. School attachment              | -.289*  | -.174* | -.176* | -.082* | -.476* | -.230* | -.359* | -.271* | .264* | —      |        |        |        |      |    |
| 11. Parental attachment            | -.185*  | -.283* | -.144* | -.151* | -.366* | -.215* | -.265* | -.265* | .199* | .368*  | —      |        |        |      |    |
| 12. Gun access                     | .103*   | .029*  | .041*  | .004   | .065*  | .058*  | .105*  | .119*  | -.004 | -.044* | .014   | —      |        |      |    |
| 13. Female                         | -.207*  | .024*  | .081*  | .116*  | -.106* | .006   | -.163* | -.051* | .254* | .220*  | -.009  | -.091* | —      |      |    |
| 14. White                          | .011    | .011   | -.033* | -.047* | -.011  | -.011  | .010   | .031*  | .019  | -.034* | -.035* | .067*  | .006   | —    |    |
| 15. Parental education             | -.063*  | -.087* | -.039* | -.076* | -.169* | -.048* | -.092* | -.116* | .044* | .084*  | .146*  | -.121* | -.026* | .015 | —  |

\* $p < .05$

**Supplemental Appendix 3: Bivariate Correlations Among Level-2 Variables**

|                                                           | 1     | 2      | 3     | 4      | 5     | 6    | 7 |
|-----------------------------------------------------------|-------|--------|-------|--------|-------|------|---|
| 1. School disorder                                        | —     |        |       |        |       |      |   |
| 2. School efficacy                                        | -.167 | —      |       |        |       |      |   |
| 3. School security                                        | -.047 | -.013  | —     |        |       |      |   |
| 4. Total school enrollment                                | -.053 | -.249* | .293* | —      |       |      |   |
| 5. Percentage students receiving free/reduced-price lunch | .059  | -.040  | -.153 | -.373* | —     |      |   |
| 6. Percent male students                                  | -.043 | .054   | .065  | -.106  | .031  | —    |   |
| 7. Percent non-white students                             | .082  | .040   | .131  | .212*  | -.142 | .006 | — |

\* $p < .05$
